# Supplementary material
Source: MDPI journal article supplement (https://www.mdpi.com/2075-163X/9/2/90)

Figure S1

Mineral-melt equilibrium for clinopyroxene and plagioclase thermobarometry. Equilibrium is within the grey lines. (A) Fe-Mg equilibrium for clinopyroxene and whole rock lavas and Mid Atlantic gabbro (Melson & O'Hearn, 2003) as proxy for corresponding melt compositions for xenoliths and Cape Verde samples from Holm et al. (2006) for the lavas. Fe-Mg partitioning according to Putirka (2008). Analyses not in equilibrium did not proceed on to thermobarometric modelling. (B) Clinopyroxene components Diopside-Hedenbergite. (C) Clinopyroxene components Enstatite-Ferrosilite. (D) Clinopyroxene components Ca-Tschermacker. (E) Clinopyroxene component Jadeite. (F) Na-Ca equilibrium between xenolith plagioclase and Atlantic gabbro. Equilibrium lines follow Putirka 2008.

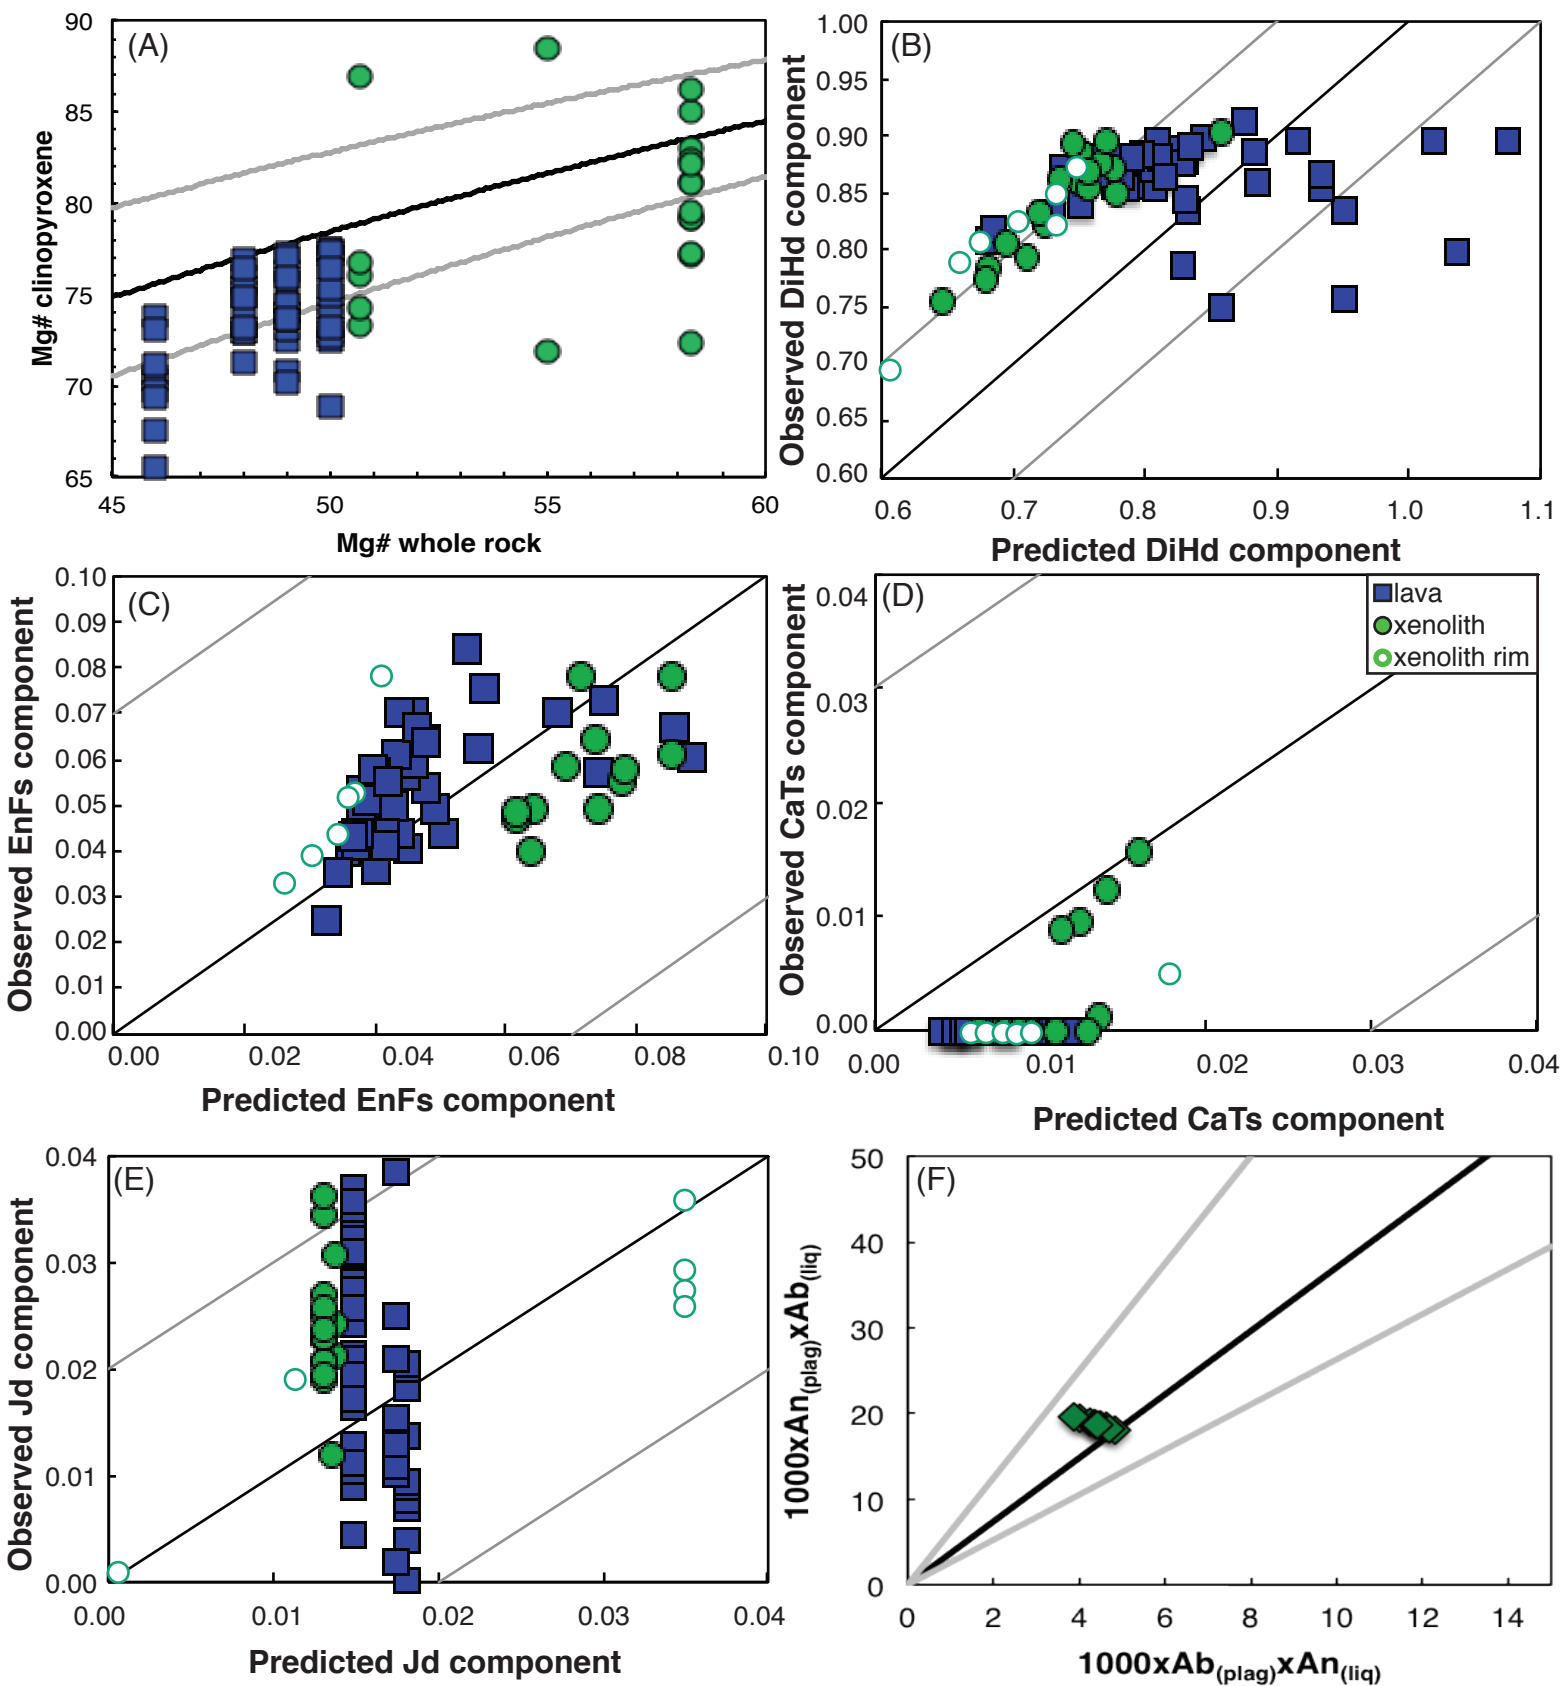

Supplement: s1 [file s1]
